# Supplementary material
Source: PubMed Central journal article supplement (PMC7657253)
Supplement: CAS-104-1120-s002.pdf [file CAS-104-1120-s002.pdf]

## Supporting Information

(A)

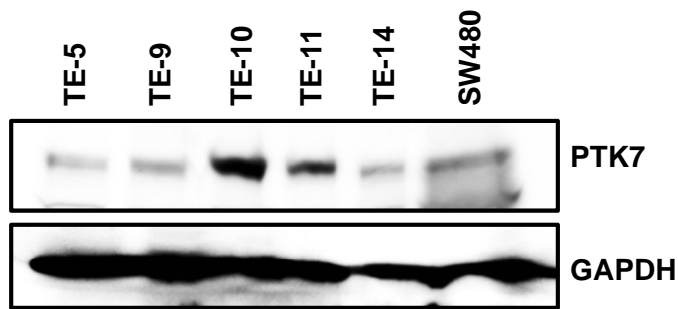

(B)

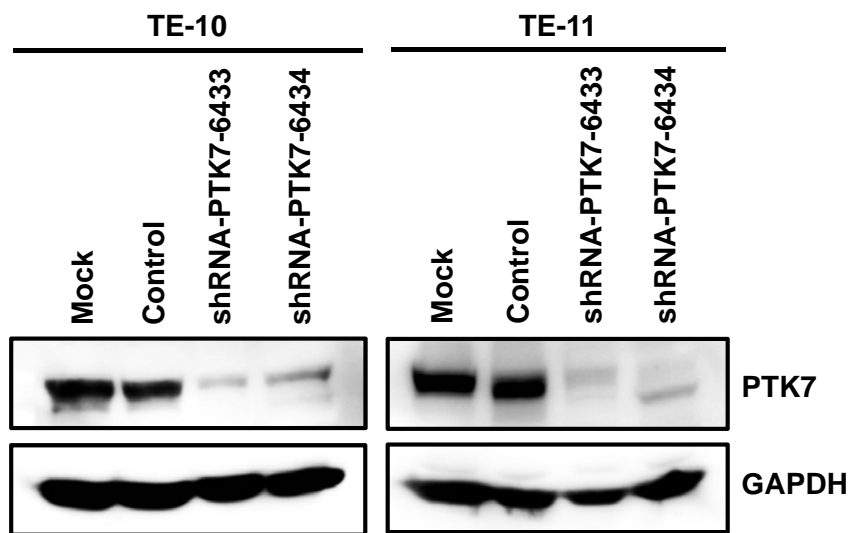

**Figure S1. PTK7 expression and knockdown in ESCC cell lines.**

(A) PTK7 levels in various ESCC cell lines were analyzed by western blotting. (B) PTK7 expression in TE-10 and TE-11 cells was silenced by infection with lentiviruses expressing two different shRNA vectors against PTK7 (shRNA-PTK7-6433 and shRNA-PTK7-6434).

Knockdown of PTK7 was confirmed by western blot analysis.
